# Supplementary material for: Mesoporous and carbon hybrid structures from layered molecular precursors for Li-ion battery application: the case of β-In2S3
Source: Royal Society of Chemistry journal article supplement (doi:10.1039/c6cc00520a), 2016-01-01

# checkCIF/PLATON report

You have not supplied any structure factors. As a result the full set of tests cannot be run.

THIS REPORT IS FOR GUIDANCE ONLY. IF USED AS PART OF A REVIEW PROCEDURE FOR PUBLICATION, IT SHOULD NOT REPLACE THE EXPERTISE OF AN EXPERIENCED CRYSTALLOGRAPHIC REFEREE.

No syntax errors found.      CIF dictionary      Interpreting this report

## Datablock: a

---

|                 |                  |                    |            |
|-----------------|------------------|--------------------|------------|
| Bond precision: | In- S = 0.0055 A | Wavelength=0.71073 |            |
| Cell:           | a=7.764(3)       | b=7.764(3)         | c=39.41(2) |
|                 | alpha=90         | beta=90            | gamma=90   |
| Temperature:    | 566 K            |                    |            |
|                 | Calculated       | Reported           |            |
| Volume          | 2376(2)          | 2375.6(19)         |            |
| Space group     | I 41/a m d       | I4(1)/amd          |            |
| Hall group      | -I 4bd 2         | ?                  |            |
| Moiety formula  | In S2            | C2N2H9InS2         |            |
| Sum formula     | In S2            | C2N2H9InS2         |            |
| Mr              | 178.94           | 240.05             |            |
| Dx,g cm-3       | 2.001            | 2.685              |            |
| Z               | 16               | 16                 |            |
| Mu (mm-1)       | 4.508            | 4.554              |            |
| F000            | 1296.0           | 1856.0             |            |
| F000'           | 1288.51          |                    |            |
| h,k,lmax        | 9,9,47           | 9,9,47             |            |
| Nref            | 646              | 606                |            |
| Tmin,Tmax       | 0.365,0.761      | 0.194,1.000        |            |
| Tmin'           | 0.370            |                    |            |

Correction method= # Reported T Limits: Tmin=0.194 Tmax=1.000  
AbsCorr = MULTI-SCAN

Data completeness= 0.938      Theta(max)= 25.450

R(reflections)= 0.2593( 481)      wR2(reflections)= 0.7481( 606)

S = 1.000      Npar= 43

---

The following ALERTS were generated. Each ALERT has the format

**test-name\_ALERT\_alert-type\_alert-level.**

Click on the hyperlinks for more details of the test.

---

### Alert level A

CHEMW03\_ALERT\_2\_A ALERT: The ratio of given/expected molecular weight as calculated from the \_atom\_site\* data lies outside the range 0.90 <> 1.10

From the CIF: \_cell\_formula\_units\_Z 16  
From the CIF: \_chemical\_formula\_weight 240.05  
TEST: Calculate formula weight from \_atom\_site\_\*

| atom | mass   | num  | sum    |
|------|--------|------|--------|
| C    | 12.01  | 0.00 | 0.00   |
| H    | 1.01   | 0.00 | 0.00   |
| N    | 14.01  | 0.00 | 0.00   |
| S    | 32.07  | 2.00 | 64.13  |
| In   | 114.82 | 1.00 | 114.82 |

Calculated formula weight 178.95

RFACG01\_ALERT\_3\_A The value of the R factor is > 0.20  
R factor given 0.259

RFACR01\_ALERT\_3\_A The value of the weighted R factor is > 0.45  
Weighted R factor given 0.748

RINTA01\_ALERT\_3\_A The value of Rint is greater than 0.25  
Rint given 0.371

PLAT020\_ALERT\_3\_A The value of Rint is greater than 0.12 ..... 0.371 Report

PLAT029\_ALERT\_3\_A \_diffrn\_measured\_fraction\_theta\_full Low ..... 0.938 Note

PLAT043\_ALERT\_1\_A Calculated and Reported Mol. Weight Differ by .. 61.11 Check

PLAT082\_ALERT\_2\_A High R1 Value ..... 0.26 Report

PLAT084\_ALERT\_3\_A High wR2 Value (i.e. > 0.25) ..... 0.75 Report

PLAT601\_ALERT\_2\_A Structure Contains Solvent Accessible VOIDS of . 290 Ang3

---

### Alert level B

CHEMS01\_ALERT\_1\_B The sum formula contains elements in the wrong order.  
N precedes H  
Sequence must be C, H, then alphabetical.

CRYSS01\_ALERT\_1\_B The magnitudes of the crystal dimensions do not match the min, mid and max definitions

SHFSU01\_ALERT\_2\_B The absolute value of parameter shift to su ratio > 0.10  
Absolute value of the parameter shift to su ratio given 0.123  
Additional refinement cycles may be required.

PLAT080\_ALERT\_2\_B Maximum Shift/Error ..... 0.12 Why ?

PLAT232\_ALERT\_2\_B Hirshfeld Test Diff (M-X) In1 -- S2 .. 11.0 s.u.

---

### Alert level C

ABSTY02\_ALERT\_1\_C An \_exptl\_absorpt\_correction\_type has been given without a literature citation. This should be contained in the \_exptl\_absorpt\_process\_details field.  
Absorption correction given as Multi-scan

PLAT041\_ALERT\_1\_C Calc. and Reported SumFormula Strings Differ Please Check

PLAT051\_ALERT\_1\_C Mu(calc) and Mu(CIF) Ratio Differs from 1.0 by . 1.02 %

PLAT068\_ALERT\_1\_C Reported F000 Differs from Calcd (or Missing)... Please Check

PLAT234\_ALERT\_4\_C Large Hirshfeld Difference In1 -- S1 .. 0.16 Ang.

---

### Alert level G

FORMU01\_ALERT\_2\_G There is a discrepancy between the atom counts in the \_chemical\_formula\_sum and the formula from the \_atom\_site\* data.  
Atom count from \_chemical\_formula\_sum: C2 H9 In1 N2 S2  
Atom count from the \_atom\_site data: In1 S2

CELLZ01\_ALERT\_1\_G Difference between formula and atom\_site contents detected.

CELLZ01\_ALERT\_1\_G ALERT: Large difference may be due to a symmetry error - see SYMMG tests  
From the CIF: \_cell\_formula\_units\_Z 16

From the CIF: \_chemical\_formula\_sum C2N2H9InS2  
 TEST: Compare cell contents of formula and atom\_site data  
 WARNING: Unexpected atom type is in site list: In  
 WARNING: Unexpected atom type is in site list: S  
 WARNING: Formula and atom\_type\_symbol element names mismatch.

| atom | Z*formula | cif sites | diff   |
|------|-----------|-----------|--------|
| C    | 32.00     | 0.00      | 32.00  |
| N    | 32.00     | 0.00      | 32.00  |
| H    | 144.00    | 0.00      | 144.00 |
| InS  | 32.00     | 0.00      | 32.00  |

WARNING: Site labels do not match formula elements

|                   |                                                  |      |              |
|-------------------|--------------------------------------------------|------|--------------|
| PLAT004_ALERT_5_G | Polymeric Structure Found with Maximum Dimension | 1    | Info         |
| PLAT005_ALERT_5_G | No Embedded Refinement Details found in the CIF  |      | Please Do !  |
| PLAT042_ALERT_1_G | Calc. and Reported MoietyFormula Strings Differ  |      | Please Check |
| PLAT072_ALERT_2_G | SHELXL First Parameter in WGHT Unusually Large   | 0.99 | Report       |
| PLAT232_ALERT_2_G | Hirshfeld Test Diff (M-X) In1 -- S3 ..           | 5.6  | s.u.         |
| PLAT764_ALERT_4_G | Overcomplete CIF Bond List Detected (Rep/Expd) . | 1.75 | Ratio        |
| PLAT794_ALERT_5_G | Tentative Bond Valency for In1 (III) .....       | 2.87 | Note         |
| PLAT899_ALERT_4_G | SHELXL97 is Deprecated and Succeeded by SHELXL   |      | 2014 Note    |

- 
- 10 **ALERT level A** = Most likely a serious problem - resolve or explain  
 5 **ALERT level B** = A potentially serious problem, consider carefully  
 5 **ALERT level C** = Check. Ensure it is not caused by an omission or oversight  
 11 **ALERT level G** = General information/check it is not something unexpected
- 10 ALERT type 1 CIF construction/syntax error, inconsistent or missing data  
 9 ALERT type 2 Indicator that the structure model may be wrong or deficient  
 6 ALERT type 3 Indicator that the structure quality may be low  
 3 ALERT type 4 Improvement, methodology, query or suggestion  
 3 ALERT type 5 Informative message, check
-

It is advisable to attempt to resolve as many as possible of the alerts in all categories. Often the minor alerts point to easily fixed oversights, errors and omissions in your CIF or refinement strategy, so attention to these fine details can be worthwhile. In order to resolve some of the more serious problems it may be necessary to carry out additional measurements or structure refinements. However, the purpose of your study may justify the reported deviations and the more serious of these should normally be commented upon in the discussion or experimental section of a paper or in the "special\_details" fields of the CIF. checkCIF was carefully designed to identify outliers and unusual parameters, but every test has its limitations and alerts that are not important in a particular case may appear. Conversely, the absence of alerts does not guarantee there are no aspects of the results needing attention. It is up to the individual to critically assess their own results and, if necessary, seek expert advice.

### **Publication of your CIF in IUCr journals**

A basic structural check has been run on your CIF. These basic checks will be run on all CIFs submitted for publication in IUCr journals (*Acta Crystallographica*, *Journal of Applied Crystallography*, *Journal of Synchrotron Radiation*); however, if you intend to submit to *Acta Crystallographica Section C* or *E*, you should make sure that full publication checks are run on the final version of your CIF prior to submission.

### **Publication of your CIF in other journals**

Please refer to the *Notes for Authors* of the relevant journal for any special instructions relating to CIF submission.

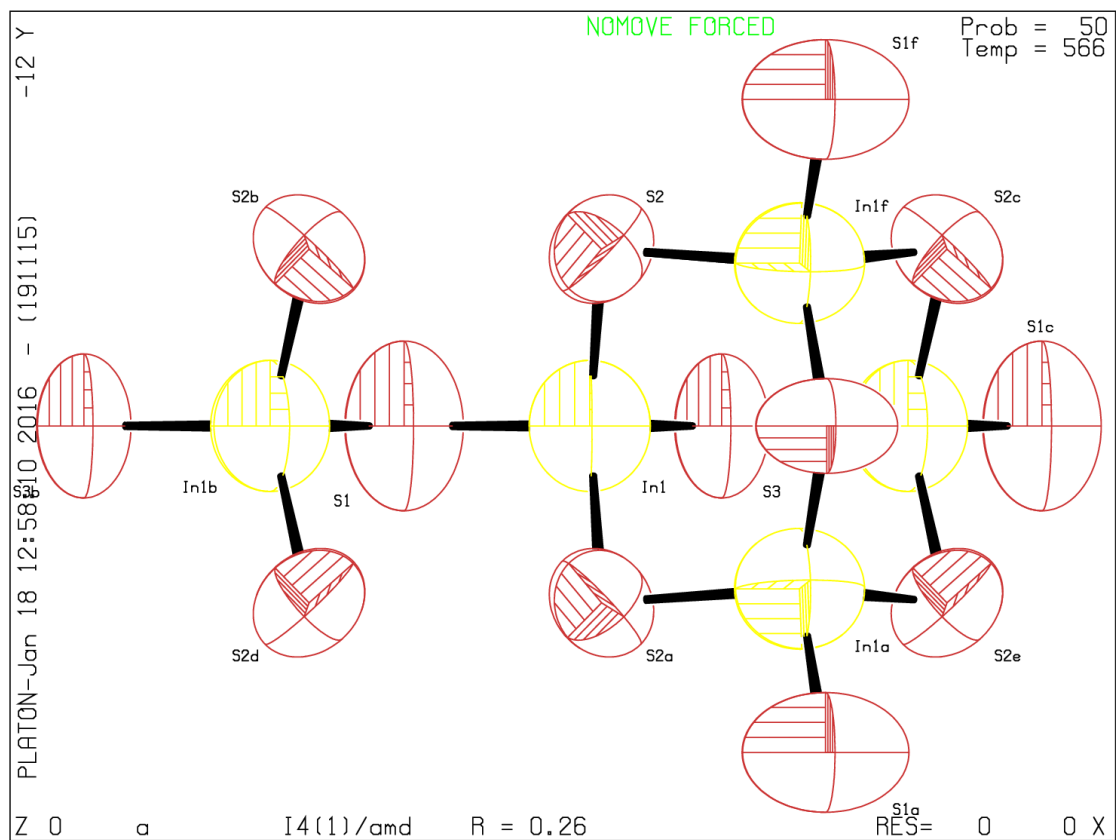

Supplement: c6cc00520a1.zip [file c6cc00520a1.zip]
