# Supplementary material for: Mesoporous and carbon hybrid structures from layered molecular precursors for Li-ion battery application: the case of β-In2S3
Source: Royal Society of Chemistry journal article supplement (doi:10.1039/c6cc00520a), 2016-01-01

# checkCIF/PLATON report

You have not supplied any structure factors. As a result the full set of tests cannot be run.

THIS REPORT IS FOR GUIDANCE ONLY. IF USED AS PART OF A REVIEW PROCEDURE FOR PUBLICATION, IT SHOULD NOT REPLACE THE EXPERTISE OF AN EXPERIENCED CRYSTALLOGRAPHIC REFEREE.

No syntax errors found.      CIF dictionary      Interpreting this report

## Datablock: a

---

Bond precision:    In- S = 0.0160 A                      Wavelength=0.71073

Cell:                      a=11.041(16)              b=11.012(15)              c=15.50(2)  
                                alpha=90                      beta=99.99(3)              gamma=90

Temperature:              566 K

|                | Calculated  | Reported    |
|----------------|-------------|-------------|
| Volume         | 1856(4)     | 1856(5)     |
| Space group    | C 2/c       | C2/c        |
| Hall group     | -C 2yc      | ?           |
| Moiety formula | In3 S6      | Nh4InS2     |
| Sum formula    | In3 S6      | Nh4InS2     |
| Mr             | 536.82      | 196.98      |
| Dx,g cm-3      | 3.842       | 4.229       |
| Z              | 8           | 24          |
| Mu (mm-1)      | 8.656       | 8.683       |
| F000           | 1944.0      | 2208.0      |
| F000'          | 1932.76     |             |
| h,k,lmax       | 13,13,18    | 13,12,18    |
| Nref           | 1698        | 1593        |
| Tmin,Tmax      | 0.131,0.648 | 0.365,1.000 |
| Tmin'          | 0.099       |             |

Correction method= # Reported T Limits: Tmin=0.365 Tmax=1.000  
AbsCorr = MULTI-SCAN

Data completeness= 0.938                      Theta(max)= 25.300

R(reflections)= 0.2884( 499)                      wR2(reflections)= 0.6831( 1593)

S = 1.012                      Npar= 93

---

The following ALERTS were generated. Each ALERT has the format  
**test-name\_ALERT\_alert-type\_alert-level.**  
Click on the hyperlinks for more details of the test.

---

### Alert level A

CHEMW03\_ALERT\_2\_A ALERT: The ratio of given/expected molecular weight as calculated from the \_atom\_site\* data lies outside the range 0.90 <> 1.10

From the CIF: \_cell\_formula\_units\_Z 24  
From the CIF: \_chemical\_formula\_weight 196.98  
TEST: Calculate formula weight from \_atom\_site\_\*

| atom | mass   | num  | sum    |
|------|--------|------|--------|
| N    | 14.01  | 0.00 | 0.00   |
| S    | 32.07  | 2.00 | 64.13  |
| In   | 114.82 | 1.00 | 114.82 |
| H    | 1.01   | 0.00 | 0.00   |

Calculated formula weight 178.95

RFACG01\_ALERT\_3\_A The value of the R factor is > 0.20  
R factor given 0.288

RFACR01\_ALERT\_3\_A The value of the weighted R factor is > 0.45  
Weighted R factor given 0.683

RINTA01\_ALERT\_3\_A The value of Rint is greater than 0.25  
Rint given 0.251

PLAT020\_ALERT\_3\_A The value of Rint is greater than 0.12 ..... 0.251 Report

PLAT029\_ALERT\_3\_A \_diffrn\_measured\_fraction\_theta\_full Low ..... 0.938 Note

PLAT031\_ALERT\_4\_A Refined Extinction Parameter within Range ..... 0.867 Sigma

PLAT043\_ALERT\_1\_A Calculated and Reported Mol. Weight Differ by .. 54.12 Check

PLAT082\_ALERT\_2\_A High R1 Value ..... 0.29 Report

PLAT084\_ALERT\_3\_A High wR2 Value (i.e. > 0.25) ..... 0.68 Report

---

### Alert level B

CHEMS01\_ALERT\_1\_B The sum formula contains elements in the wrong order.  
N precedes H  
Sequence must be alphabetical for inorganic structures.

DIFMX01\_ALERT\_2\_B The maximum difference density is > 0.1\*ZMAX\*1.00  
\_refine\_diff\_density\_max given = 6.765  
Test value = 4.900

PLAT097\_ALERT\_2\_B Large Reported Max. (Positive) Residual Density 6.76 eA-3

PLAT234\_ALERT\_4\_B Large Hirshfeld Difference In3 -- S6 .. 0.30 Ang.

PLAT234\_ALERT\_4\_B Large Hirshfeld Difference In3 -- S1\_e .. 0.26 Ang.

PLAT241\_ALERT\_2\_B High 'MainMol' Ueq as Compared to Neighbors of S6 Check

---

### Alert level C

ABSTY02\_ALERT\_1\_C An \_exptl\_absorpt\_correction\_type has been given without a literature citation. This should be contained in the \_exptl\_absorpt\_process\_details field.  
Absorption correction given as Multi-scan

DIFMN02\_ALERT\_2\_C The minimum difference density is < -0.1\*ZMAX\*0.75  
\_refine\_diff\_density\_min given = -3.987  
Test value = -3.675

DIFMN03\_ALERT\_1\_C The minimum difference density is < -0.1\*ZMAX\*0.75  
The relevant atom site should be identified.

DIFMX02\_ALERT\_1\_C The maximum difference density is > 0.1\*ZMAX\*0.75  
The relevant atom site should be identified.

PLAT041\_ALERT\_1\_C Calc. and Reported SumFormula Strings Differ Please Check

PLAT068\_ALERT\_1\_C Reported F000 Differs from Calcd (or Missing)... Please Check

PLAT098\_ALERT\_2\_C Large Reported Min. (Negative) Residual Density -3.99 eA-3

PLAT148\_ALERT\_3\_C s.u. on the a - Axis is (Too) Large ..... 0.016 Ang.

PLAT148\_ALERT\_3\_C s.u. on the b - Axis is (Too) Large ..... 0.0150 Ang.

PLAT148\_ALERT\_3\_C s.u. on the c - Axis is (Too) Large ..... 0.020 Ang.

PLAT213\_ALERT\_2\_C Atom S3 has ADP max/min Ratio ..... 3.1 prolat

PLAT234\_ALERT\_4\_C Large Hirshfeld Difference In1 -- S1 .. 0.19 Ang.

PLAT234\_ALERT\_4\_C Large Hirshfeld Difference In2 -- S3 .. 0.19 Ang.

|                   |                                                |         |    |           |
|-------------------|------------------------------------------------|---------|----|-----------|
| PLAT234_ALERT_4_C | Large Hirshfeld Difference In2                 | -- S4   | .. | 0.21 Ang. |
| PLAT234_ALERT_4_C | Large Hirshfeld Difference In2                 | -- S5_c | .. | 0.20 Ang. |
| PLAT241_ALERT_2_C | High 'MainMol' Ueq as Compared to Neighbors of |         |    | S4 Check  |
| PLAT242_ALERT_2_C | Low 'MainMol' Ueq as Compared to Neighbors of  |         |    | In1 Check |
| PLAT242_ALERT_2_C | Low 'MainMol' Ueq as Compared to Neighbors of  |         |    | In2 Check |
| PLAT242_ALERT_2_C | Low 'MainMol' Ueq as Compared to Neighbors of  |         |    | S2 Check  |

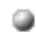

### Alert level G

FORMU01\_ALERT\_2\_G There is a discrepancy between the atom counts in the  
   \_chemical\_formula\_sum and the formula from the \_atom\_site\* data.  
   Atom count from \_chemical\_formula\_sum: H4 In1 N1 S2  
   Atom count from the \_atom\_site data: In1 S2

CELLZ01\_ALERT\_1\_G Difference between formula and atom\_site contents detected.  
 CELLZ01\_ALERT\_1\_G ALERT: Large difference may be due to a  
   symmetry error - see SYMMG tests  
   From the CIF: \_cell\_formula\_units\_Z 24  
   From the CIF: \_chemical\_formula\_sum NH4InS2  
   TEST: Compare cell contents of formula and atom\_site data  
   WARNING: Unexpected atom type is in site list: In  
   WARNING: Unexpected atom type is in site list: S  
   WARNING: Formula and atom\_type\_symbol element names mismatch.

| atom | Z*formula | cif sites | diff  |
|------|-----------|-----------|-------|
| NH   | 96.00     | 0.00      | 96.00 |
| InS  | 48.00     | 0.00      | 48.00 |

WARNING: Site labels do not match formula elements

|                   |                                                  |      |              |
|-------------------|--------------------------------------------------|------|--------------|
| PLAT004_ALERT_5_G | Polymeric Structure Found with Maximum Dimension | 2    | Info         |
| PLAT005_ALERT_5_G | No Embedded Refinement Details found in the CIF  |      | Please Do !  |
| PLAT042_ALERT_1_G | Calc. and Reported MoietyFormula Strings Differ  |      | Please Check |
| PLAT045_ALERT_1_G | Calculated and Reported Z Differ by .....        | 0.33 | Ratio        |
| PLAT072_ALERT_2_G | SHELXL First Parameter in WGHT Unusually Large   | 0.55 | Report       |
| PLAT232_ALERT_2_G | Hirshfeld Test Diff (M-X) In3 -- S2 ..           | 8.4  | s.u.         |
| PLAT300_ALERT_4_G | Atom Site Occupancy of *In3 is Constrained at    | 0.5  | Check        |
| PLAT300_ALERT_4_G | Atom Site Occupancy of *In4 is Constrained at    | 0.5  | Check        |
| PLAT301_ALERT_3_G | Main Residue Disorder ..... Percentage =         | 11   | Note         |
| PLAT793_ALERT_4_G | The Model has Chirality at S1 (Centro SPGR)      |      | R Verify     |
| PLAT793_ALERT_4_G | The Model has Chirality at S2 (Centro SPGR)      |      | S Verify     |
| PLAT793_ALERT_4_G | The Model has Chirality at S3 (Centro SPGR)      |      | R Verify     |
| PLAT794_ALERT_5_G | Tentative Bond Valency for In1 (III) .....       | 3.52 | Note         |
| PLAT794_ALERT_5_G | Tentative Bond Valency for In2 (III) .....       | 3.26 | Note         |
| PLAT899_ALERT_4_G | SHELXL97 is Deprecated and Succeeded by SHELXL   | 2014 | Note         |

---

10 **ALERT level A** = Most likely a serious problem - resolve or explain  
 6 **ALERT level B** = A potentially serious problem, consider carefully  
 19 **ALERT level C** = Check. Ensure it is not caused by an omission or oversight  
 18 **ALERT level G** = General information/check it is not something unexpected

11 ALERT type 1 CIF construction/syntax error, inconsistent or missing data  
 15 ALERT type 2 Indicator that the structure model may be wrong or deficient  
 10 ALERT type 3 Indicator that the structure quality may be low  
 13 ALERT type 4 Improvement, methodology, query or suggestion  
 4 ALERT type 5 Informative message, check

---

It is advisable to attempt to resolve as many as possible of the alerts in all categories. Often the minor alerts point to easily fixed oversights, errors and omissions in your CIF or refinement strategy, so attention to these fine details can be worthwhile. In order to resolve some of the more serious problems it may be necessary to carry out additional measurements or structure refinements. However, the purpose of your study may justify the reported deviations and the more serious of these should normally be commented upon in the discussion or experimental section of a paper or in the "special\_details" fields of the CIF. checkCIF was carefully designed to identify outliers and unusual parameters, but every test has its limitations and alerts that are not important in a particular case may appear. Conversely, the absence of alerts does not guarantee there are no aspects of the results needing attention. It is up to the individual to critically assess their own results and, if necessary, seek expert advice.

### **Publication of your CIF in IUCr journals**

A basic structural check has been run on your CIF. These basic checks will be run on all CIFs submitted for publication in IUCr journals (*Acta Crystallographica*, *Journal of Applied Crystallography*, *Journal of Synchrotron Radiation*); however, if you intend to submit to *Acta Crystallographica Section C* or *E*, you should make sure that full publication checks are run on the final version of your CIF prior to submission.

### **Publication of your CIF in other journals**

Please refer to the *Notes for Authors* of the relevant journal for any special instructions relating to CIF submission.

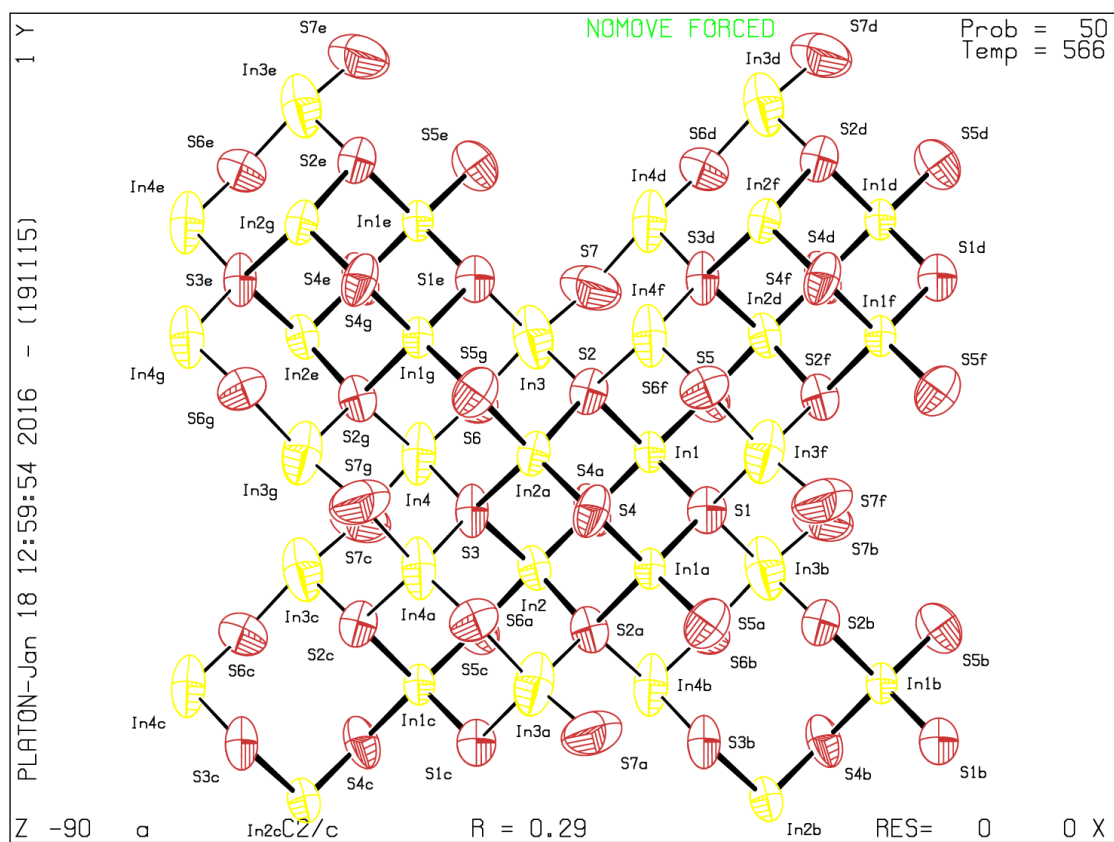

Supplement: c6cc00520a1.zip [file c6cc00520a1.zip]
