# Supplementary material for: Mesoporous and carbon hybrid structures from layered molecular precursors for Li-ion battery application: the case of β-In2S3
Source: Royal Society of Chemistry journal article supplement (doi:10.1039/c6cc00520a), 2016-01-01
Supplement: c6cc00520a1.zip [file c6cc00520a1.zip]

Archive with 4 entries (4 files):
- checkcif-EnInS2.pdf
- checkcif-NH4InS2.pdf
- EnInS2.CIF
- NH4InS2.CIF
