# Supplementary material for: Mesoporous and carbon hybrid structures from layered molecular precursors for Li-ion battery application: the case of β-In2S3
Source: Royal Society of Chemistry journal article supplement (doi:10.1039/c6cc00520a), 2016-01-01
Supplement: c6cc00520a1.zip [file c6cc00520a1.zip › EnInS2.CIF]

 
data_a 
 
_audit_creation_method            SHELXL-97 
_chemical_name_systematic 
; 
 'C2N2H9InS2' 
; 
_chemical_name_common             'C2N2H9InS2' 
_chemical_melting_point           'not measured' 
_chemical_formula_moiety          'C2N2H9InS2' 
_chemical_formula_sum 
 'C2N2H9InS2' 
_chemical_formula_weight          240.05 
 
loop_ 
 _atom_type_symbol 
 _atom_type_description 
 _atom_type_scat_dispersion_real 
 _atom_type_scat_dispersion_imag 
 _atom_type_scat_source 
 'C'  'C'   0.0033   0.0016 
 'International Tables Vol C Tables 4.2.6.8 and 6.1.1.4' 
 'H'  'H'   0.0000   0.0000 
 'International Tables Vol C Tables 4.2.6.8 and 6.1.1.4' 
 'N'  'N'   0.0061   0.0033 
 'International Tables Vol C Tables 4.2.6.8 and 6.1.1.4' 
 'S'  'S'   0.1246   0.1234 
 'International Tables Vol C Tables 4.2.6.8 and 6.1.1.4' 
 'In'  'In'  -0.7276   1.3100 
 'International Tables Vol C Tables 4.2.6.8 and 6.1.1.4' 
 
_symmetry_cell_setting            'tetragonal' 
_symmetry_space_group_name_H-M    'I4(1)/amd'
 
loop_ 
 _symmetry_equiv_pos_as_xyz 
 'x, y, z' 
 '-x+1/2, -y, z+1/2' 
 '-y+1/4, x+3/4, z+1/4' 
 'y+1/4, -x+1/4, z+3/4' 
 '-x+1/2, y, -z+1/2' 
 'x, -y, -z' 
 'y+1/4, x+3/4, -z+1/4' 
 '-y+1/4, -x+1/4, -z+3/4' 
 'x+1/2, y+1/2, z+1/2' 
 '-x+1, -y+1/2, z+1' 
 '-y+3/4, x+5/4, z+3/4' 
 'y+3/4, -x+3/4, z+5/4' 
 '-x+1, y+1/2, -z+1' 
 'x+1/2, -y+1/2, -z+1/2' 
 'y+3/4, x+5/4, -z+3/4' 
 '-y+3/4, -x+3/4, -z+5/4' 
 '-x, -y, -z' 
 'x-1/2, y, -z-1/2' 
 'y-1/4, -x-3/4, -z-1/4' 
 '-y-1/4, x-1/4, -z-3/4' 
 'x-1/2, -y, z-1/2' 
 '-x, y, z' 
 '-y-1/4, -x-3/4, z-1/4' 
 'y-1/4, x-1/4, z-3/4' 
 '-x+1/2, -y+1/2, -z+1/2' 
 'x, y+1/2, -z' 
 'y+1/4, -x-1/4, -z+1/4' 
 '-y+1/4, x+1/4, -z-1/4' 
 'x, -y+1/2, z' 
 '-x+1/2, y+1/2, z+1/2' 
 '-y+1/4, -x-1/4, z+1/4' 
 'y+1/4, x+1/4, z-1/4' 
 
_cell_length_a                    7.764(3) 
_cell_length_b                    7.764(3) 
_cell_length_c                    39.41(2) 
_cell_angle_alpha                 90.00 
_cell_angle_beta                  90.00 
_cell_angle_gamma                 90.00 
_cell_volume                      2375.6(19) 
_cell_formula_units_Z             16 
_cell_measurement_temperature     566(2) 
_cell_measurement_reflns_used     1253 
_cell_measurement_theta_min       21.6 
_cell_measurement_theta_max       68.8 
 
_exptl_crystal_description        'Plate' 
_exptl_crystal_colour             'Light yellow' 
_exptl_crystal_size_max           0.21 
_exptl_crystal_size_mid           0.23 
_exptl_crystal_size_min           0.06 
_exptl_crystal_density_meas       'not measured' 
_exptl_crystal_density_diffrn     2.685 
_exptl_crystal_density_method     'not measured' 
_exptl_crystal_F_000              1856 
_exptl_absorpt_coefficient_mu     4.554 
_exptl_absorpt_correction_type    'Multi-scan' 
_exptl_absorpt_correction_T_min   0.194 
_exptl_absorpt_correction_T_max   1.000 
_exptl_absorpt_process_details    ? 
 
_exptl_special_details 
; 
 ? 
; 
 
_diffrn_ambient_temperature       566(2) 
_diffrn_radiation_wavelength      0.71073 
_diffrn_radiation_type            MoK\a 
_diffrn_radiation_source          'fine-focus sealed tube' 
_diffrn_radiation_monochromator   graphite 
_diffrn_measurement_device_type   'Rigaku Saturn944+ (2x2 bin mode)' 
_diffrn_measurement_method        'profile data from \w-scans'
_diffrn_detector_area_resol_mean  22.2222 
_diffrn_standards_number          ? 
_diffrn_standards_interval_count  ? 
_diffrn_standards_interval_time   ? 
_diffrn_standards_decay_%         ? 
_diffrn_reflns_number             3730 
_diffrn_reflns_av_R_equivalents   0.3715 
_diffrn_reflns_av_sigmaI/netI     0.2281 
_diffrn_reflns_limit_h_min        -9 
_diffrn_reflns_limit_h_max        8 
_diffrn_reflns_limit_k_min        -9 
_diffrn_reflns_limit_k_max        8 
_diffrn_reflns_limit_l_min        -37 
_diffrn_reflns_limit_l_max        47 
_diffrn_reflns_theta_min          2.07 
_diffrn_reflns_theta_max          25.45 
_reflns_number_total              606 
_reflns_number_gt                 481 
_reflns_threshold_expression      >2sigma(I) 
 
_computing_data_collection        'CrystalClear-SM Expert 2.0 r4 (Rigaku, 2009)' 
_computing_cell_refinement        'CrystalClear-SM Expert 2.0 r4 (Rigaku, 2009)'
_computing_data_reduction         'CrystalClear-SM Expert 2.0 r4 (Rigaku, 2009)'
_computing_structure_solution     'SHELXS-97 (Sheldrick, 1990)' 
_computing_structure_refinement   'SHELXL-97 (Sheldrick, 1997)' 
_computing_molecular_graphics     ? 
_computing_publication_material   'SHELXL-97 (Sheldrick, 1997)' 
 
_refine_special_details 
; 
 Refinement of F^2^ against ALL reflections.  The weighted R-factor wR and 
 goodness of fit S are based on F^2^, conventional R-factors R are based 
 on F, with F set to zero for negative F^2^. The threshold expression of 
 F^2^ > 2sigma(F^2^) is used only for calculating R-factors(gt) etc. and is 
 not relevant to the choice of reflections for refinement.  R-factors based 
 on F^2^ are statistically about twice as large as those based on F, and R- 
 factors based on ALL data will be even larger. 
; 
 
_refine_ls_structure_factor_coef  Fsqd  
_refine_ls_matrix_type            full 
_refine_ls_weighting_scheme       calc  
_refine_ls_weighting_details 
 'calc w=1/[\s^2^(Fo^2^)+(0.9900P)^2^+0.0000P] where P=(Fo^2^+2Fc^2^)/3' 
_atom_sites_solution_primary      direct 
_atom_sites_solution_secondary    difmap 
_atom_sites_solution_hydrogens    ? 
_refine_ls_hydrogen_treatment     ? 
_refine_ls_extinction_method      SHELXL 
_refine_ls_extinction_coef        627(45) 
_refine_ls_extinction_expression 
 'Fc^*^=kFc[1+0.001xFc^2^\l^3^/sin(2\q)]^-1/4^' 
_refine_ls_number_reflns          606 
_refine_ls_number_parameters      43 
_refine_ls_number_restraints      0 
_refine_ls_R_factor_all           0.2655 
_refine_ls_R_factor_gt            0.2593 
_refine_ls_wR_factor_ref          0.7481 
_refine_ls_wR_factor_gt           0.7282 
_refine_ls_goodness_of_fit_ref    1.000 
_refine_ls_restrained_S_all       1.000 
_refine_ls_shift/su_max           0.123 
_refine_ls_shift/su_mean          0.009 
 
loop_ 
 _atom_site_label 
 _atom_site_type_symbol 
 _atom_site_fract_x 
 _atom_site_fract_y 
 _atom_site_fract_z 
 _atom_site_U_iso_or_equiv 
 _atom_site_adp_type 
 _atom_site_occupancy 
 _atom_site_symmetry_multiplicity 
 _atom_site_calc_flag 
 _atom_site_refinement_flags 
 _atom_site_disorder_assembly 
 _atom_site_disorder_group 
In1 In 0.2505(3) 0.2500 0.08888(9) 0.213(4) Uani 1 2 d S . . 
S1 S 0.0000 0.2500 0.0519(2) 0.254(9) Uani 1 4 d S . . 
S2 S 0.2292(6) 0.5208(6) 0.1250 0.165(4) Uani 1 2 d S . . 
S3 S 0.5000 0.2500 0.0501(2) 0.185(6) Uani 1 4 d S . . 
 
loop_ 
 _atom_site_aniso_label 
 _atom_site_aniso_U_11 
 _atom_site_aniso_U_22 
 _atom_site_aniso_U_33 
 _atom_site_aniso_U_23 
 _atom_site_aniso_U_13 
 _atom_site_aniso_U_12 
In1 0.218(6) 0.257(7) 0.164(6) 0.000 0.0095(9) 0.000 
S1 0.214(8) 0.43(2) 0.122(6) 0.000 0.000 0.000 
S2 0.176(5) 0.176(5) 0.144(6) -0.028(2) -0.028(2) 0.032(2) 
S3 0.134(5) 0.310(15) 0.112(6) 0.000 0.000 0.000 
 
_geom_special_details 
; 
 All esds (except the esd in the dihedral angle between two l.s. planes) 
 are estimated using the full covariance matrix.  The cell esds are taken 
 into account individually in the estimation of esds in distances, angles 
 and torsion angles; correlations between esds in cell parameters are only 
 used when they are defined by crystal symmetry.  An approximate (isotropic) 
 treatment of cell esds is used for estimating esds involving l.s. planes. 
; 
 
loop_ 
 _geom_bond_atom_site_label_1 
 _geom_bond_atom_site_label_2 
 _geom_bond_distance 
 _geom_bond_site_symmetry_2 
 _geom_bond_publ_flag 
In1 S1 2.431(6) . ? 
In1 S3 2.468(6) . ? 
In1 S2 2.544(5) . ? 
In1 S2 2.544(5) 20_656 ? 
S1 In1 2.431(6) 10_454 ? 
S2 In1 2.544(5) 27_565 ? 
S3 In1 2.468(6) 10_554 ? 
 
loop_ 
 _geom_angle_atom_site_label_1 
 _geom_angle_atom_site_label_2 
 _geom_angle_atom_site_label_3 
 _geom_angle 
 _geom_angle_site_symmetry_1 
 _geom_angle_site_symmetry_3 
 _geom_angle_publ_flag 
S1 In1 S3 104.9(3) . . ? 
S1 In1 S2 106.48(16) . . ? 
S3 In1 S2 113.42(12) . . ? 
S1 In1 S2 106.48(16) . 20_656 ? 
S3 In1 S2 113.42(12) . 20_656 ? 
S2 In1 S2 111.45(17) . 20_656 ? 
In1 S1 In1 106.3(4) . 10_454 ? 
In1 S2 In1 101.9(3) . 27_565 ? 
In1 S3 In1 103.5(3) . 10_554 ? 
 
_diffrn_measured_fraction_theta_max    0.938 
_diffrn_reflns_theta_full              25.45 
_diffrn_measured_fraction_theta_full   0.938 
_refine_diff_density_max    2.385 
_refine_diff_density_min   -1.607 
_refine_diff_density_rms    0.447 
