# Supplementary material for: Mesoporous and carbon hybrid structures from layered molecular precursors for Li-ion battery application: the case of β-In2S3
Source: Royal Society of Chemistry journal article supplement (doi:10.1039/c6cc00520a), 2016-01-01
Supplement: c6cc00520a1.zip [file c6cc00520a1.zip › NH4InS2.CIF]

 
data_a 
 
_audit_creation_method            SHELXL-97 
_chemical_name_systematic 
; 
 'NH4InS2' 
; 
_chemical_name_common             'NH4InS2' 
_chemical_melting_point           'not measured' 
_chemical_formula_moiety          'NH4InS2' 
_chemical_formula_sum 
 'NH4InS2' 
_chemical_formula_weight          196.98 
 
loop_ 
 _atom_type_symbol 
 _atom_type_description 
 _atom_type_scat_dispersion_real 
 _atom_type_scat_dispersion_imag 
 _atom_type_scat_source 
 'N'  'N'   0.0061   0.0033 
 'International Tables Vol C Tables 4.2.6.8 and 6.1.1.4' 
 'S'  'S'   0.1246   0.1234 
 'International Tables Vol C Tables 4.2.6.8 and 6.1.1.4' 
 'In'  'In'  -0.7276   1.3100 
 'International Tables Vol C Tables 4.2.6.8 and 6.1.1.4' 
 'H'  'H'   0.0000   0.0000 
 'International Tables Vol C Tables 4.2.6.8 and 6.1.1.4' 
 
_symmetry_cell_setting            'monoclinic' 
_symmetry_space_group_name_H-M    'C2/c' 
 
loop_ 
 _symmetry_equiv_pos_as_xyz 
 'x, y, z' 
 '-x, y, -z+1/2' 
 'x+1/2, y+1/2, z' 
 '-x+1/2, y+1/2, -z+1/2' 
 '-x, -y, -z' 
 'x, -y, z-1/2' 
 '-x+1/2, -y+1/2, -z' 
 'x+1/2, -y+1/2, z-1/2' 
 
_cell_length_a                    11.041(16) 
_cell_length_b                    11.012(15) 
_cell_length_c                    15.50(2) 
_cell_angle_alpha                 90.00 
_cell_angle_beta                  99.99(3) 
_cell_angle_gamma                 90.00 
_cell_volume                      1856(5) 
_cell_formula_units_Z             24 
_cell_measurement_temperature     566(2) 
_cell_measurement_reflns_used     2285 
_cell_measurement_theta_min       22.7 
_cell_measurement_theta_max       67.7 
 
_exptl_crystal_description        'Plate' 
_exptl_crystal_colour             'Colorless' 
_exptl_crystal_size_max           0.25 
_exptl_crystal_size_mid           0.22 
_exptl_crystal_size_min           0.05 
_exptl_crystal_density_meas       'not measured' 
_exptl_crystal_density_diffrn     4.229 
_exptl_crystal_density_method     'not measured' 
_exptl_crystal_F_000              2208 
_exptl_absorpt_coefficient_mu     8.683 
_exptl_absorpt_correction_type    'Multi-scan' 
_exptl_absorpt_correction_T_min   0.365 
_exptl_absorpt_correction_T_max   1.000 
_exptl_absorpt_process_details    ? 
 
_exptl_special_details 
; 
 ? 
; 
 
_diffrn_ambient_temperature       566(2) 
_diffrn_radiation_wavelength      0.71073 
_diffrn_radiation_type            MoK\a 
_diffrn_radiation_source          'fine-focus sealed tube' 
_diffrn_radiation_monochromator   graphite 
_diffrn_measurement_device_type   'Rigaku Saturn944+ (2x2 bin mode)'
_diffrn_measurement_method        'profile data from \w-scans' 
_diffrn_detector_area_resol_mean  22.2222
_diffrn_standards_number          ? 
_diffrn_standards_interval_count  ? 
_diffrn_standards_interval_time   ? 
_diffrn_standards_decay_%         ? 
_diffrn_reflns_number             5932 
_diffrn_reflns_av_R_equivalents   0.2512 
_diffrn_reflns_av_sigmaI/netI     0.1588 
_diffrn_reflns_limit_h_min        -12 
_diffrn_reflns_limit_h_max        13 
_diffrn_reflns_limit_k_min        -12 
_diffrn_reflns_limit_k_max        12 
_diffrn_reflns_limit_l_min        -18 
_diffrn_reflns_limit_l_max        18 
_diffrn_reflns_theta_min          2.63 
_diffrn_reflns_theta_max          25.30 
_reflns_number_total              1593 
_reflns_number_gt                 499 
_reflns_threshold_expression      >2sigma(I) 
 
_computing_data_collection        'CrystalClear-SM Expert 2.0 r4 (Rigaku, 2009)'
_computing_cell_refinement        'CrystalClear-SM Expert 2.0 r4 (Rigaku, 2009)'
_computing_data_reduction         'CrystalClear-SM Expert 2.0 r4 (Rigaku, 2009)'
_computing_structure_solution     'SHELXS-97 (Sheldrick, 1990)' 
_computing_structure_refinement   'SHELXL-97 (Sheldrick, 1997)' 
_computing_molecular_graphics     ? 
_computing_publication_material   'SHELXL-97 (Sheldrick, 1997)' 
 
_refine_special_details 
; 
 Refinement of F^2^ against ALL reflections.  The weighted R-factor wR and 
 goodness of fit S are based on F^2^, conventional R-factors R are based 
 on F, with F set to zero for negative F^2^. The threshold expression of 
 F^2^ > 2sigma(F^2^) is used only for calculating R-factors(gt) etc. and is 
 not relevant to the choice of reflections for refinement.  R-factors based 
 on F^2^ are statistically about twice as large as those based on F, and R- 
 factors based on ALL data will be even larger. 
; 
 
_refine_ls_structure_factor_coef  Fsqd  
_refine_ls_matrix_type            full 
_refine_ls_weighting_scheme       calc  
_refine_ls_weighting_details 
 'calc w=1/[\s^2^(Fo^2^)+(0.5500P)^2^+0.0000P] where P=(Fo^2^+2Fc^2^)/3' 
_atom_sites_solution_primary      direct 
_atom_sites_solution_secondary    difmap 
_atom_sites_solution_hydrogens    ? 
_refine_ls_hydrogen_treatment     ? 
_refine_ls_extinction_method      SHELXL 
_refine_ls_extinction_coef        0.0013(15) 
_refine_ls_extinction_expression 
 'Fc^*^=kFc[1+0.001xFc^2^\l^3^/sin(2\q)]^-1/4^' 
_refine_ls_number_reflns          1593 
_refine_ls_number_parameters      93 
_refine_ls_number_restraints      0 
_refine_ls_R_factor_all           0.3472 
_refine_ls_R_factor_gt            0.2884 
_refine_ls_wR_factor_ref          0.6831 
_refine_ls_wR_factor_gt           0.6184 
_refine_ls_goodness_of_fit_ref    1.012 
_refine_ls_restrained_S_all       1.012 
_refine_ls_shift/su_max           0.012 
_refine_ls_shift/su_mean          0.002 
 
loop_ 
 _atom_site_label 
 _atom_site_type_symbol 
 _atom_site_fract_x 
 _atom_site_fract_y 
 _atom_site_fract_z 
 _atom_site_U_iso_or_equiv 
 _atom_site_adp_type 
 _atom_site_occupancy 
 _atom_site_symmetry_multiplicity 
 _atom_site_calc_flag 
 _atom_site_refinement_flags 
 _atom_site_disorder_assembly 
 _atom_site_disorder_group 
In1 In 1.1001(4) 0.1871(2) 0.1584(2) 0.077(2) Uani 1 1 d . . . 
In2 In 0.8509(4) 0.4375(3) 0.1578(2) 0.087(2) Uani 1 1 d . . . 
In3 In 1.3491(14) 0.4385(8) 0.1599(7) 0.154(7) Uani 0.50 1 d P . . 
In4 In 1.0983(12) 0.6865(6) 0.1596(5) 0.129(6) Uani 0.50 1 d P . . 
S1 S 1.0000 0.0638(14) 0.2500 0.089(6) Uani 1 2 d S . . 
S2 S 1.2567(15) 0.3184(9) 0.2495(7) 0.087(5) Uani 1 1 d . . . 
S3 S 1.0000 0.5717(13) 0.2500 0.094(7) Uani 1 2 d S . . 
S4 S 0.949(2) 0.3121(12) 0.0625(13) 0.118(6) Uani 1 1 d . . . 
S5 S 1.192(2) 0.0636(15) 0.0634(12) 0.120(6) Uani 1 1 d . . . 
S6 S 1.191(3) 0.568(2) 0.091(3) 0.222(16) Uani 1 1 d . . . 
S7 S 1.434(4) 0.314(3) 0.084(4) 0.246(19) Uani 1 1 d . . . 
 
loop_ 
 _atom_site_aniso_label 
 _atom_site_aniso_U_11 
 _atom_site_aniso_U_22 
 _atom_site_aniso_U_33 
 _atom_site_aniso_U_23 
 _atom_site_aniso_U_13 
 _atom_site_aniso_U_12 
In1 0.096(4) 0.056(3) 0.076(3) 0.0013(12) 0.006(2) 0.0004(14) 
In2 0.113(4) 0.064(3) 0.079(3) -0.0043(13) 0.003(2) 0.0137(16) 
In3 0.215(19) 0.095(8) 0.128(10) -0.008(5) -0.036(11) 0.028(7) 
In4 0.209(16) 0.067(6) 0.090(7) 0.004(3) -0.034(8) -0.010(5) 
S1 0.111(16) 0.089(12) 0.050(8) 0.000 -0.034(9) 0.000 
S2 0.117(12) 0.085(9) 0.051(7) 0.002(4) -0.010(7) -0.013(7) 
S3 0.139(18) 0.062(9) 0.054(9) 0.000 -0.059(10) 0.000 
S4 0.150(15) 0.080(9) 0.113(11) 0.017(6) -0.009(9) 0.040(8) 
S5 0.148(16) 0.125(13) 0.087(10) -0.019(7) 0.019(9) 0.029(10) 
S6 0.14(2) 0.14(2) 0.42(5) -0.007(19) 0.13(3) 0.020(15) 
S7 0.15(3) 0.22(4) 0.39(6) 0.06(3) 0.13(3) 0.05(2) 
 
_geom_special_details 
; 
 All esds (except the esd in the dihedral angle between two l.s. planes) 
 are estimated using the full covariance matrix.  The cell esds are taken 
 into account individually in the estimation of esds in distances, angles 
 and torsion angles; correlations between esds in cell parameters are only 
 used when they are defined by crystal symmetry.  An approximate (isotropic) 
 treatment of cell esds is used for estimating esds involving l.s. planes. 
; 
 
loop_ 
 _geom_bond_atom_site_label_1 
 _geom_bond_atom_site_label_2 
 _geom_bond_distance 
 _geom_bond_site_symmetry_2 
 _geom_bond_publ_flag 
In1 S5 2.358(17) . ? 
In1 S1 2.372(10) . ? 
In1 S4 2.454(16) . ? 
In1 S2 2.496(12) . ? 
In2 S2 2.406(14) 2_755 ? 
In2 S4 2.41(2) . ? 
In2 S3 2.474(9) . ? 
In2 S5 2.50(2) 3_455 ? 
In3 S7 2.13(4) . ? 
In3 S2 2.283(18) . ? 
In3 S6 2.36(4) . ? 
In3 S1 2.413(14) 3 ? 
In4 S6 2.06(3) . ? 
In4 S3 2.295(13) . ? 
In4 S7 2.42(4) 3_455 ? 
In4 S2 2.424(14) 4_755 ? 
S1 In1 2.372(10) 2_755 ? 
S1 In3 2.413(14) 3_445 ? 
S1 In3 2.413(14) 4_745 ? 
S2 In2 2.406(14) 2_755 ? 
S2 In4 2.424(14) 4_745 ? 
S3 In4 2.295(13) 2_755 ? 
S3 In2 2.474(9) 2_755 ? 
S5 In2 2.50(2) 3_545 ? 
S7 In4 2.42(4) 3_545 ? 
 
loop_ 
 _geom_angle_atom_site_label_1 
 _geom_angle_atom_site_label_2 
 _geom_angle_atom_site_label_3 
 _geom_angle 
 _geom_angle_site_symmetry_1 
 _geom_angle_site_symmetry_3 
 _geom_angle_publ_flag 
S5 In1 S1 109.8(6) . . ? 
S5 In1 S4 105.4(7) . . ? 
S1 In1 S4 110.2(6) . . ? 
S5 In1 S2 110.9(7) . . ? 
S1 In1 S2 110.0(3) . . ? 
S4 In1 S2 110.4(5) . . ? 
S2 In2 S4 112.0(5) 2_755 . ? 
S2 In2 S3 109.2(3) 2_755 . ? 
S4 In2 S3 111.8(6) . . ? 
S2 In2 S5 106.4(6) 2_755 3_455 ? 
S4 In2 S5 107.7(6) . 3_455 ? 
S3 In2 S5 109.6(5) . 3_455 ? 
S7 In3 S2 104.3(10) . . ? 
S7 In3 S6 120(2) . . ? 
S2 In3 S6 104.5(10) . . ? 
S7 In3 S1 111.2(15) . 3 ? 
S2 In3 S1 108.4(5) . 3 ? 
S6 In3 S1 107.5(10) . 3 ? 
S6 In4 S3 107.0(9) . . ? 
S6 In4 S7 121(2) . 3_455 ? 
S3 In4 S7 102.7(10) . 3_455 ? 
S6 In4 S2 110.1(13) . 4_755 ? 
S3 In4 S2 108.0(5) . 4_755 ? 
S7 In4 S2 107.3(12) 3_455 4_755 ? 
In1 S1 In1 110.2(6) 2_755 . ? 
In1 S1 In3 109.1(3) 2_755 3_445 ? 
In1 S1 In3 109.1(3) . 3_445 ? 
In1 S1 In3 109.1(3) 2_755 4_745 ? 
In1 S1 In3 109.1(3) . 4_745 ? 
In3 S1 In3 110.3(7) 3_445 4_745 ? 
In3 S2 In2 111.5(5) . 2_755 ? 
In3 S2 In4 112.4(7) . 4_745 ? 
In2 S2 In4 108.9(5) 2_755 4_745 ? 
In3 S2 In1 109.3(5) . . ? 
In2 S2 In1 106.8(6) 2_755 . ? 
In4 S2 In1 107.7(4) 4_745 . ? 
In4 S3 In4 113.2(7) . 2_755 ? 
In4 S3 In2 108.3(2) . . ? 
In4 S3 In2 110.1(3) 2_755 . ? 
In4 S3 In2 110.1(3) . 2_755 ? 
In4 S3 In2 108.3(2) 2_755 2_755 ? 
In2 S3 In2 106.6(5) . 2_755 ? 
In2 S4 In1 106.3(7) . . ? 
In1 S5 In2 106.8(7) . 3_545 ? 
In4 S6 In3 123(2) . . ? 
In3 S7 In4 118(3) . 3_545 ? 
 
_diffrn_measured_fraction_theta_max    0.938 
_diffrn_reflns_theta_full              25.30 
_diffrn_measured_fraction_theta_full   0.938 
_refine_diff_density_max    6.765 
_refine_diff_density_min   -3.987 
_refine_diff_density_rms    0.899 
