# Supplementary material for: Mesoporous and carbon hybrid structures from layered molecular precursors for Li-ion battery application: the case of β-In2S3
Source: Royal Society of Chemistry journal article supplement (doi:10.1039/c6cc00520a), 2016-01-01
Supplement: c6cc00520a2.pdf [file c6cc00520a2.pdf]

## Supporting Information for

### **Mesoporous and carbon hybrid structures from layered molecular precursors for the Li-ion battery application: the case of $\beta$ -In<sub>2</sub>S<sub>3</sub>**

*Ming-Jian Zhang,<sup>‡</sup> Lei-Lei Tian,<sup>‡</sup> Shuankui Li, Ling-Piao Lin and Feng Pan\**

*School of Advanced Materials, Peking University Shenzhen Graduate School,  
Shenzhen 518055, China*

*\*Tel./fax: +86-755-26033200. E-mail: [panfeng@pkusz.edu.cn](mailto:panfeng@pkusz.edu.cn) (F. Pan)*

## I Experimental Section

**Preparation of 2D molecular precursors:** All chemicals were analytical grade and used as received without further purification. In a typical reaction, 10 mmol Indium powder (1148 mg) and 25 mmol sulfur powder (320 mg) were mixed in 6 ml of 28% ammonia. The mixture was added into a Teflon-lined autoclave with a volume of 25 ml and kept at 180 °C for 5 days. After cooling to room temperature, the obtained product was collected and washed with distilled water. The carbon-coating precursor was obtained by the similar method. Differently, ethylene diamine (En) replaced ammonia as the solvent.

**Preparation of the mesoporous and carbon hybrid samples:** The mesoporous  $\text{In}_2\text{S}_3$  sample (denoted as MIS) were obtained by calcinating the carbon-free precursor  $\text{NH}_4\text{InS}_2$  at 400 °C for 1h in Ar atmosphere. The carbon hybrid  $\text{In}_2\text{S}_3$  sample (denoted as IS/C) was prepared by calcinating the carbon-containing precursor  $\text{EnInS}_2$  in the same conditions. Commercial  $\beta\text{-In}_2\text{S}_3$  (denoted as IS) was bought as the reference.

**Electrochemical tests:** The electrochemical performance of the samples was evaluated in Li-ion test cells. The working electrodes were comprised of as-prepared sample, acetylene black and polyvinylidene fluoride (PVDF) with a weight ratio of 3 : 1 : 1. Lithium metal was used as the counter and reference electrodes. The electrolyte was 1 M  $\text{LiPF}_6$  dissolved in a 1:1:1 mixture of ethylene carbonate (EC), ethylene methyl carbonate (EMC), and dimethyl carbonate (DMC). The cells were assembled in a glove box filled with high-purity argon. Discharge-charge measurements of the cells were performed at different current densities between the potentials of 0.05-3.00 V (vs  $\text{Li}^+/\text{Li}$ ) on a battery testing system (Neware, Shenzhen). The reported specific capacities are all normalized to the weight of the active materials.

## II Measurement and characteristics

X-ray diffraction (XRD) patterns were recorded using a Bruker D8 Advance powder X-ray diffractometer equipped with a rotating anode and using Cu-K $\alpha$  radiation in the range  $10^\circ \leq 2\theta \leq 80^\circ$ . Scanning electron microscopy (SEM) was performed using a Zeiss SUPRA-55 field-emission scanning electron microscope. The crystal structures of these two precursors were determined by a Rigaku Saturn 944+ X-ray single crystal diffractometer. The thermal stability of precursors was characterized by a Mettler Toledo TGA/DSC simultaneous thermal analyzer from room temperature to 900 °C with a heating rate of 10 °C min<sup>-1</sup>. Transmission electron microscopy (TEM) was performed using a JEOL-2010 instrument at an acceleration voltage of 200 kV. Nitrogen adsorption-desorption measurements were conducted at 77.35 K on an ASAP 2020 analyzer. The Brunauer-Emmett-Teller (BET) surface area was estimated using the adsorption data. The Raman spectrum was measured using a Horiba iHR320 Raman spectrometer with a cooled CCD detector.

### III Supplementary tables and figures

Table S1. Crystal data and structure refinement parameters for NH<sub>4</sub>InS<sub>2</sub> and EnInS<sub>2</sub> (C<sub>2</sub>N<sub>2</sub>H<sub>9</sub>InS<sub>2</sub>).

| chemical formula                                                     | NH <sub>4</sub> InS <sub>2</sub> | C <sub>2</sub> N <sub>2</sub> H <sub>9</sub> InS <sub>2</sub> |
|----------------------------------------------------------------------|----------------------------------|---------------------------------------------------------------|
| fw                                                                   | 196.98                           | 240.05                                                        |
| cryst size (mm <sup>3</sup> )                                        | 0.25×0.22×0.05                   | 0.23×0.21×0.06                                                |
| <i>T</i> (K)                                                         | 293(2)                           | 293(2)                                                        |
| $\lambda$ (Mo, K $\alpha$ , Å)                                       | 0.71073                          | 0.71073                                                       |
| cryst syst                                                           | Monoclinic                       | Tetragonal                                                    |
| space group                                                          | <i>C2/c</i> (15)                 | <i>I4(1)/amd</i> (141)                                        |
| <i>a</i> (Å)                                                         | 11.041(16)                       | 7.764(3)                                                      |
| <i>b</i> (Å)                                                         | 11.012(15)                       |                                                               |
| <i>c</i> (Å)                                                         | 15.50(2)                         | 39.41(2)                                                      |
| $\beta$ (deg.)                                                       | 99.99(3)                         |                                                               |
| <i>V</i> (Å <sup>3</sup> )                                           | 1856(5)                          | 2375.6(19)                                                    |
| <i>Z</i>                                                             | 24                               | 16                                                            |
| <i>D</i> <sub>calcd</sub> (g*cm <sup>-3</sup> )                      | 4.229                            | 2.685                                                         |
| $\mu$ (mm <sup>-1</sup> )                                            | 8.683                            | 4.554                                                         |
| <i>F</i> (000)                                                       | 2208                             | 1856                                                          |
| $\theta$ range (deg.)                                                | 2.63–25.30                       | 2.07–25.45                                                    |
| measd. rflns                                                         | 5932                             | 3730                                                          |
| indep. rflns/ <i>R</i> <sub>int</sub>                                | 1593/0.2512                      | 606/0.3715                                                    |
| <i>R</i> 1 <sup><i>a</i></sup> ( <i>I</i> > 2 $\sigma$ ( <i>I</i> )) | 0.2884                           | 0.2593                                                        |
| w <i>R</i> 2 <sup><i>b</i></sup> (all data)                          | 0.6831                           | 0.7481                                                        |
| GOF on <i>F</i> <sup>2</sup>                                         | 1.012                            | 1.000                                                         |
| $\Delta\rho_{\max}/\Delta\rho_{\min}$ , e/Å <sup>3</sup>             | 6.765/-3.987                     | 2.385/-1.607                                                  |

$$^aR1 = \|F_o\| - \|F_c\|/\|F_o\|, \quad ^b wR2 = [w(F_o^2 - F_c^2)^2]/[w(F_o^2)^2]^{1/2}.$$

**Notes.** There are several alerts of level A in their checkcif files. These alerts could be resulted from two causes below. On one hand, the exact positions of the charge-

balance cations,  $\text{NH}_4^+$  and  $\text{En}^+$ , could not be determined because of their serious disorder distribution between the  $\text{InS}_2^-$  layers. On the other hand, the diffraction data are not good enough because of the relatively poor crystalline of their single crystals, although multiple single crystals have been tested for them.

Table S2. Bond lengths (Å) and angles (deg.) for  $\text{NH}_4\text{InS}_2$ .

|              |           |
|--------------|-----------|
| In(1)-S(5)   | 2.358(17) |
| In(1)-S(1)   | 2.372(10) |
| In(1)-S(4)   | 2.454(16) |
| In(1)-S(2)   | 2.496(12) |
| In(2)-S(2)#1 | 2.406(14) |
| In(2)-S(4)   | 2.41(2)   |
| In(2)-S(3)   | 2.474(9)  |
| In(2)-S(5)#2 | 2.50(2)   |
| In(3)-S(7)   | 2.13(4)   |
| In(3)-S(2)   | 2.283(18) |
| In(3)-S(6)   | 2.36(4)   |
| In(3)-S(1)#3 | 2.413(14) |
| In(4)-S(6)   | 2.06(3)   |
| In(4)-S(3)   | 2.295(13) |
| In(4)-S(7)#2 | 2.42(4)   |
| In(4)-S(2)#4 | 2.424(14) |
| S(1)-In(1)#1 | 2.372(10) |
| S(1)-In(3)#5 | 2.413(14) |
| S(1)-In(3)#6 | 2.413(14) |
| S(2)-In(2)#1 | 2.406(14) |
| S(2)-In(4)#6 | 2.424(14) |
| S(3)-In(4)#1 | 2.295(13) |
| S(3)-In(2)#1 | 2.474(9)  |

---

|                      |           |
|----------------------|-----------|
| S(5)-In(2)#7         | 2.50(2)   |
| S(7)-In(4)#7         | 2.42(4)   |
| S(5)-In(1)-S(1)      | 109.8(6)  |
| S(5)-In(1)-S(4)      | 105.4(7)  |
| S(1)-In(1)-S(4)      | 110.2(6)  |
| S(5)-In(1)-S(2)      | 110.9(7)  |
| S(1)-In(1)-S(2)      | 110.0(3)  |
| S(4)-In(1)-S(2)      | 110.4(5)  |
| S(2)#1-In(2)-S(4)    | 112.0(5)  |
| S(2)#1-In(2)-S(3)    | 109.2(3)  |
| S(4)-In(2)-S(3)      | 111.8(6)  |
| S(2)#1-In(2)-S(5)#2  | 106.4(6)  |
| S(4)-In(2)-S(5)#2    | 107.7(6)  |
| S(3)-In(2)-S(5)#2    | 109.6(5)  |
| S(7)-In(3)-S(2)      | 104.3(10) |
| S(7)-In(3)-S(6)      | 120(2)    |
| S(2)-In(3)-S(6)      | 104.5(10) |
| S(7)-In(3)-S(1)#3    | 111.2(15) |
| S(2)-In(3)-S(1)#3    | 108.4(5)  |
| S(6)-In(3)-S(1)#3    | 107.5(10) |
| S(6)-In(4)-S(3)      | 107.0(9)  |
| S(6)-In(4)-S(7)#2    | 121(2)    |
| S(3)-In(4)-S(7)#2    | 102.7(10) |
| S(6)-In(4)-S(2)#4    | 110.1(13) |
| S(3)-In(4)-S(2)#4    | 108.0(5)  |
| S(7)#2-In(4)-S(2)#4  | 107.3(12) |
| In(1)#1-S(1)-In(1)   | 110.2(6)  |
| In(1)#1-S(1)-In(3)#5 | 109.1(3)  |

---

|                      |          |
|----------------------|----------|
| In(1)-S(1)-In(3)#5   | 109.1(3) |
| In(1)#1-S(1)-In(3)#6 | 109.1(3) |
| In(1)-S(1)-In(3)#6   | 109.1(3) |
| In(3)#5-S(1)-In(3)#6 | 110.3(7) |
| In(3)-S(2)-In(2)#1   | 111.5(5) |
| In(3)-S(2)-In(4)#6   | 112.4(7) |
| In(2)#1-S(2)-In(4)#6 | 108.9(5) |
| In(3)-S(2)-In(1)     | 109.3(5) |
| In(2)#1-S(2)-In(1)   | 106.8(6) |
| In(4)#6-S(2)-In(1)   | 107.7(4) |
| In(4)-S(3)-In(4)#1   | 113.2(7) |
| In(4)-S(3)-In(2)     | 108.3(2) |
| In(4)#1-S(3)-In(2)   | 110.1(3) |
| In(4)-S(3)-In(2)#1   | 110.1(3) |
| In(4)#1-S(3)-In(2)#1 | 108.3(2) |
| In(2)-S(3)-In(2)#1   | 106.6(5) |
| In(2)-S(4)-In(1)     | 106.3(7) |
| In(1)-S(5)-In(2)#7   | 106.8(7) |
| In(4)-S(6)-In(3)     | 123(2)   |
| In(3)-S(7)-In(4)#7   | 118(3)   |

Symmetry codes: (#1)  $-x+2, y, -z+1/2$ ; (#2)  $x-1/2, y+1/2, z$ ; (#3)  $x+1/2, y+1/2, z$ ; (#4)  $-x+5/2, y+1/2, -z+1/2$ ; (#5)  $x-1/2, y-1/2, z$ ; (#6)  $-x+5/2, y-1/2, -z+1/2$ ; (#7)  $x+1/2, y-1/2, z$ .

Table S3. Bond lengths (Å) and angles (deg) for EnInS<sub>2</sub>.

|              |          |
|--------------|----------|
| In(1)-S(1)   | 2.431(6) |
| In(1)-S(3)   | 2.468(6) |
| In(1)-S(2)   | 2.544(5) |
| In(1)-S(2)#1 | 2.544(5) |

|                    |            |
|--------------------|------------|
| S(1)-In(1)#2       | 2.431(6)   |
| S(2)-In(1)#3       | 2.544(5)   |
| S(3)-In(1)#4       | 2.468(6)   |
| S(1)-In(1)-S(3)    | 104.9(3)   |
| S(1)-In(1)-S(2)    | 106.48(16) |
| S(3)-In(1)-S(2)    | 113.42(12) |
| S(1)-In(1)-S(2)#1  | 106.48(16) |
| S(3)-In(1)-S(2)#1  | 113.42(12) |
| S(2)-In(1)-S(2)#1  | 111.45(17) |
| In(1)-S(1)-In(1)#2 | 106.3(4)   |
| In(1)-S(2)-In(1)#3 | 101.9(3)   |
| In(1)-S(3)-In(1)#4 | 103.5(3)   |

Symmetry codes: (#1)  $-y+3/4, x-1/4, -z+1/4$ ; (#2)  $-x+0, -y+1/2, z+0$ ; (#3)  $y+1/4, -x+3/4, -z+1/4$ ; (#4)  $-x+1, -y+1/2, z+0$ .

Table S4. The EDX results for  $\text{NH}_4\text{InS}_2$  and  $\text{EnInS}_2$ .

| Elements | atom% in $\text{NH}_4\text{InS}_2$ | atom% in $\text{EnInS}_2$ |
|----------|------------------------------------|---------------------------|
| N        | 24.3                               | 38.7                      |
| In       | 25.6                               | 21.5                      |
| S        | 50.1                               | 39.8                      |



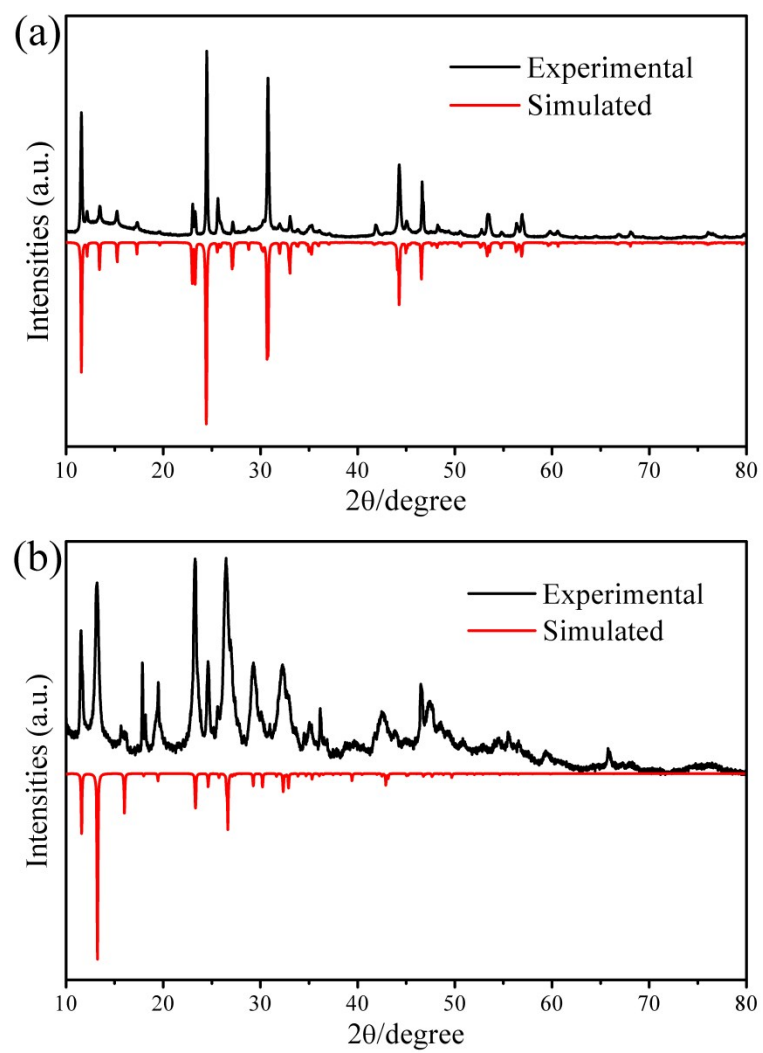

**Fig. S1** The experimental and simulated powder XRD patterns of  $\text{NH}_4\text{InS}_2$  (a) and  $\text{EnInS}_2$  (b).

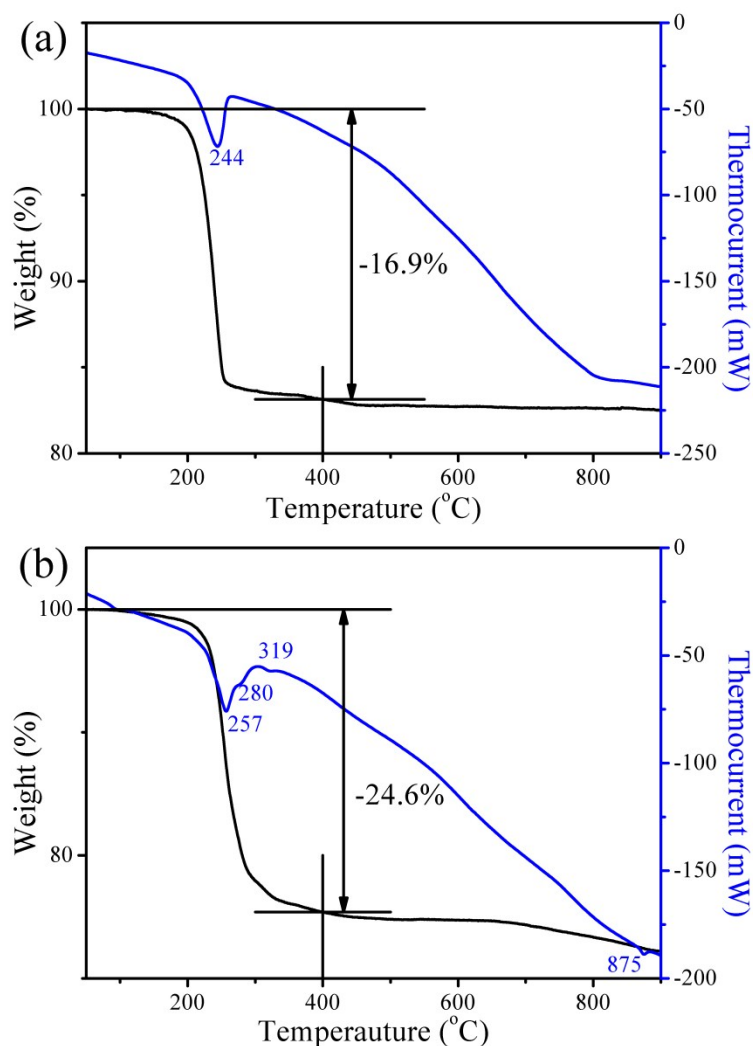

**Fig. S2** The TG curves of  $\text{NH}_4\text{InS}_2$  (a) and  $\text{EnInS}_2$  (b).

In order to evaluate the thermal stability of these two precursors, the thermogravimetric (TG) analysis was performed (Fig. S2). As shown in Fig. S2a, the weight loss is 16.9% when the temperature rises up to 400 °C, which is basically consistent with the theoretical weight loss (17.3%) from  $\text{NH}_4\text{InS}_2$  to  $\text{In}_2\text{S}_3$ . There is just one exothermic peak at 244°C, which could be ascribed to a quick weight loss process due to the release of  $\text{NH}_3$  and  $\text{H}_2\text{S}$ . As shown in Fig. S2b, the weight loss is 24.6% at 400 °C, which is lower about 8% than the theoretical weight loss (32.7%) in the decomposition from  $\text{EnInS}_2$  to  $\text{In}_2\text{S}_3$ . Accordingly, the pyrolysis carbon content in the IS/C sample could be estimated as about 12%. There are three exothermic peaks before 400 °C in the thermocurrent curve, indicating the presence of the multiple

decomposition steps.

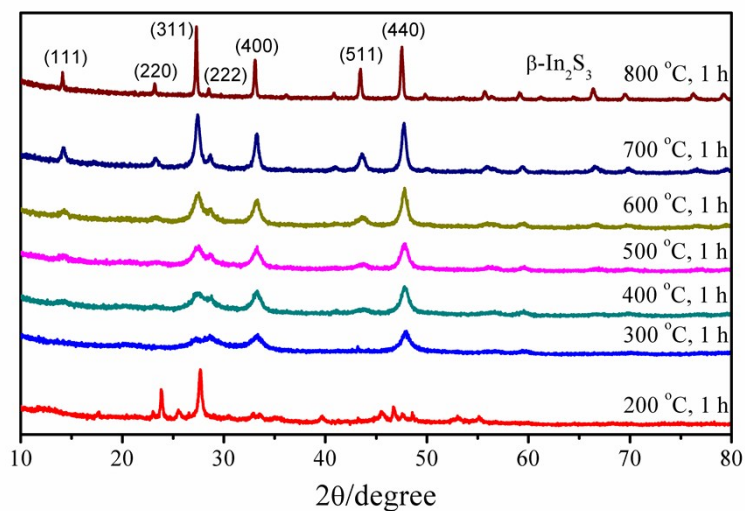

**Fig. S3** The varied temperature powder XRD patterns of  $\text{NH}_4\text{InS}_2$ .

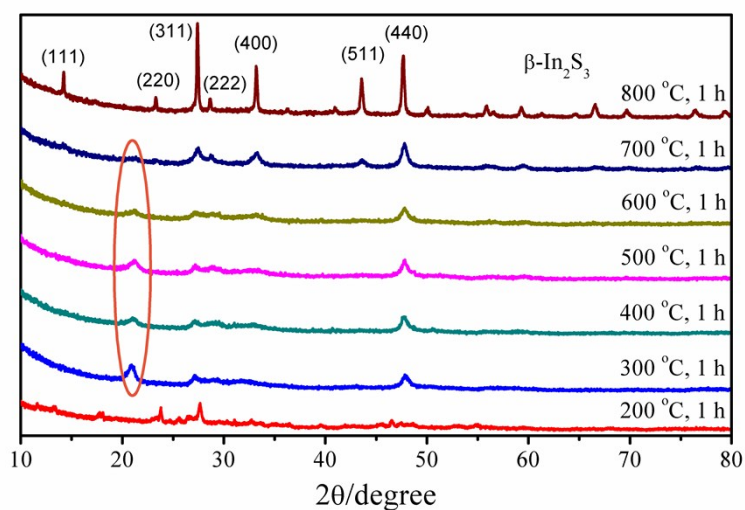

**Fig. S4** The varied temperature powder XRD patterns of  $\text{EnInS}_2$ .

The varied-temperature powder XRD was carried out to illuminate the phase conversion of  $\text{NH}_4\text{InS}_2$  and  $\text{EnInS}_2$  in the thermal decomposition process (Fig. S3 and S4). As shown in Fig. S3, when the temperature rises up to 200 °C, the intensities of many peaks significantly decrease, and two new peaks at about 24 and 28 degree show up compared with the origin pattern, indicating that the decomposition has occurred. This is consistent with the TG analysis above. When the temperature goes up to 300 °C, the original framework has been destroyed completely and converted

into the framework of  $\beta\text{-In}_2\text{S}_3$  because of the appearance of (311), (400) and (440) peaks. The intensities of these three peaks gradually increase with the rising temperature, hinting a better crystallinity. Differently with  $\text{NH}_4\text{InS}_2$ , there was a new peak at about 21 degree at 300 °C (Fig. S4) for  $\text{EnInS}_2$ . It could be assigned to the pyrolysis carbon from the interlayer En. It gradually decreases with the rising temperature, and disappears at 800 °C. This is consistent with the color change of the sample from gray to red. Owing to the multiple sintering at the increasing temperature, the pyrolysis carbon is gradually oxidized into  $\text{CO}_2$ . Notably, there is another totally different phenomenon between the patterns of  $\text{NH}_4\text{InS}_2$  and  $\text{EnInS}_2$ . The intensities of three main peaks, for (311), (400) and (440) lattice planes of  $\beta\text{-In}_2\text{S}_3$ , were basically unchanged before 700 °C for  $\text{EnInS}_2$ . They significantly increase until 700 °C and 800 °C, accompanied with the disappearance of the pyrolysis carbon. This phenomenon demonstrates that the pyrolysis carbon could greatly hinder the growth of  $\beta\text{-In}_2\text{S}_3$  from the small crystalline grain into the large crystalline grain.

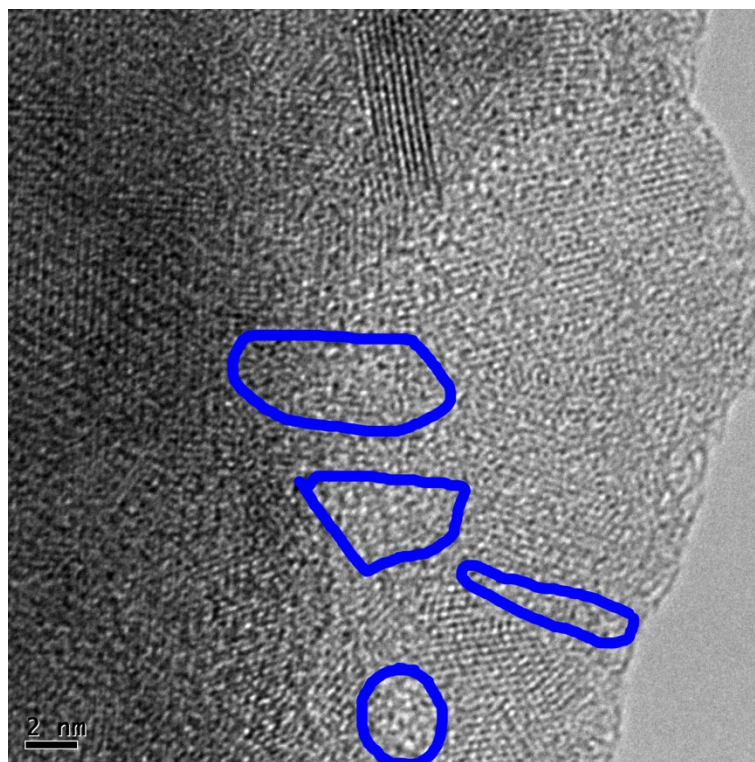

**Fig. S5** HRTEM image of the IS/C sample.

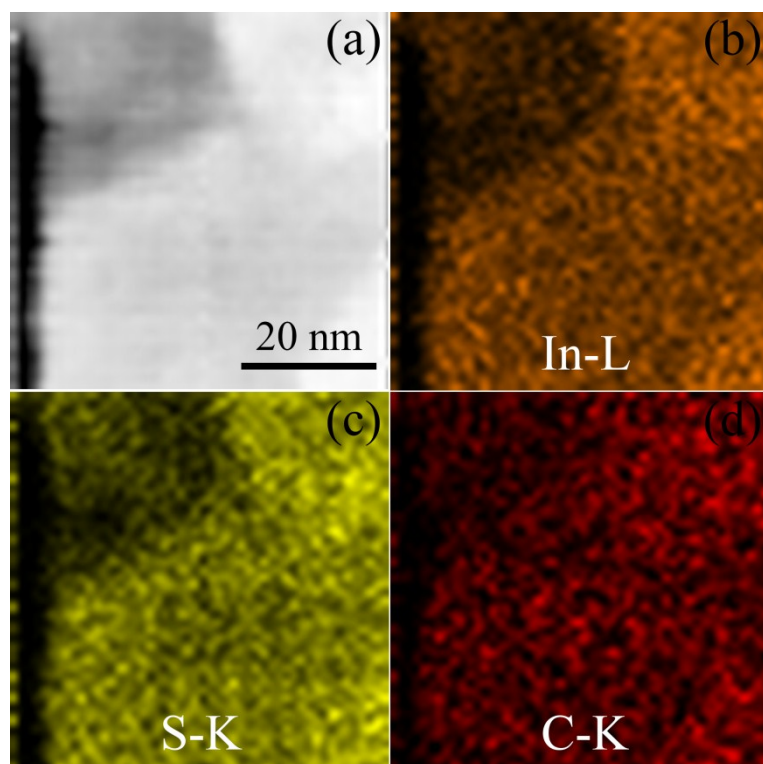

**Fig. S6** HAADF-STEM image (a), In-L EDX map (b), S-K EDX map (c) and C-K EDX map (d) of the IS/C sample.

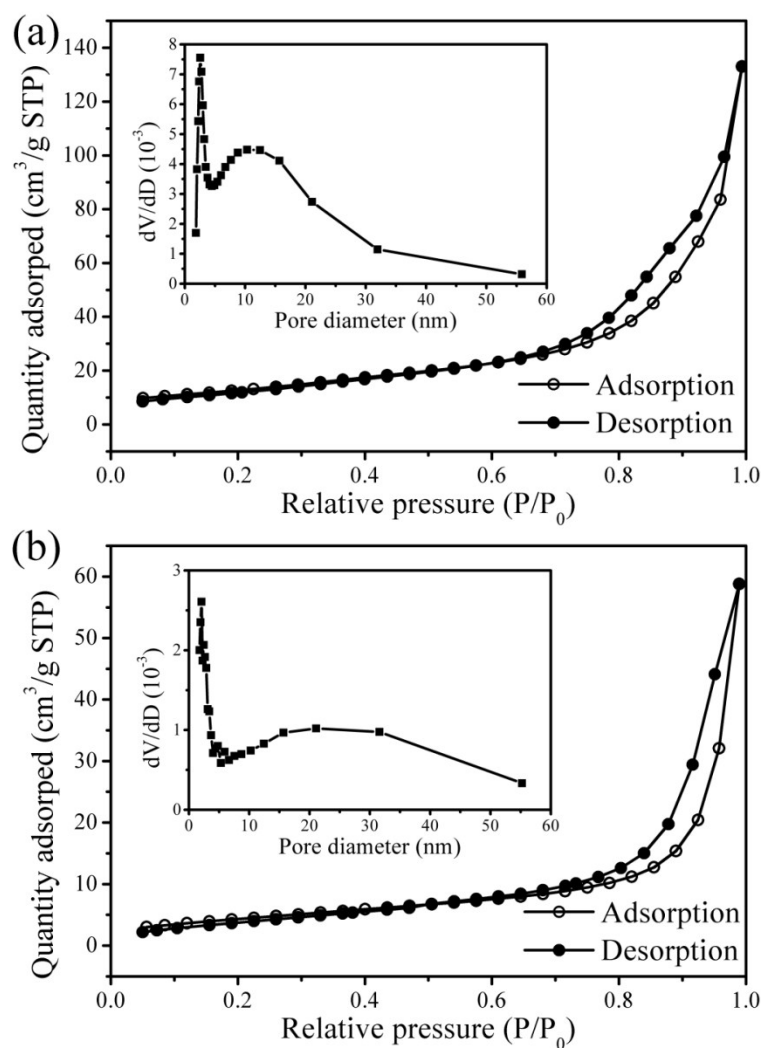

**Fig. S7** The  $N_2$  adsorption-desorption isotherm of the MIS (a) and IS/C (b) samples. The insets show the corresponding pore size distribution curves calculated by BJH equation in the adsorption branch.

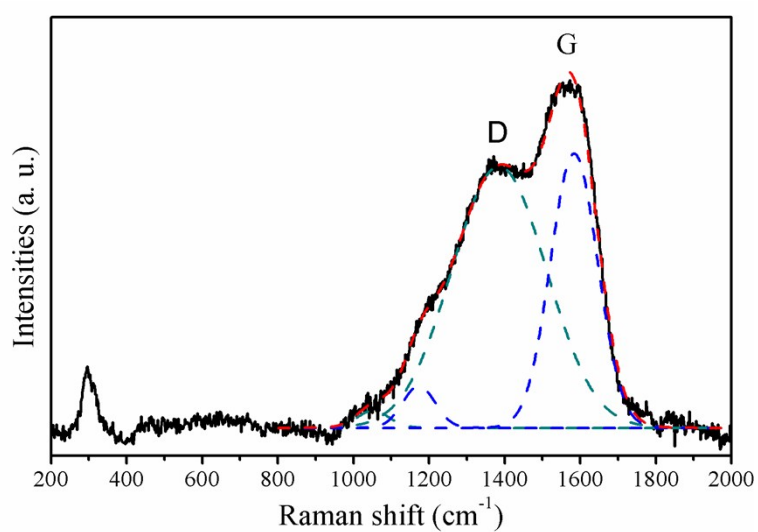

**Fig. S8** Raman spectrum of the IS/C sample.



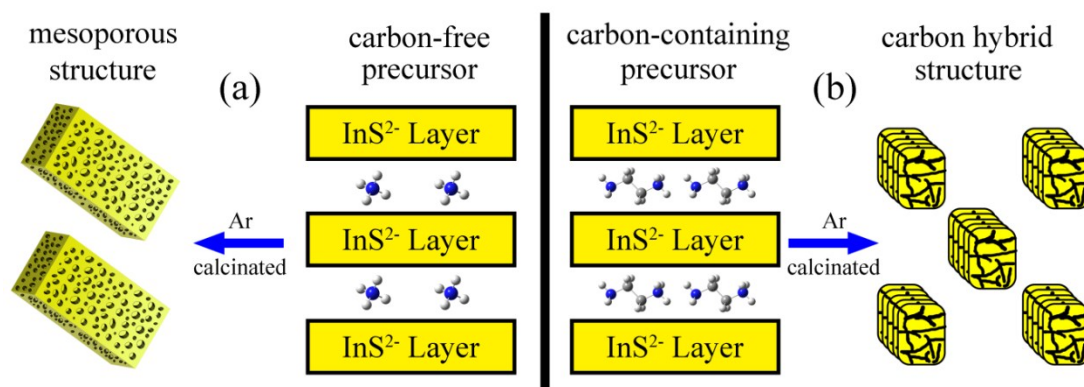

**Fig. S9** Schematic diagrams for the preparation process from the carbon-free layered precursor to the mesoporous structure (a), and from the carbon-containing layered precursor to the carbon hybrid structure (b).

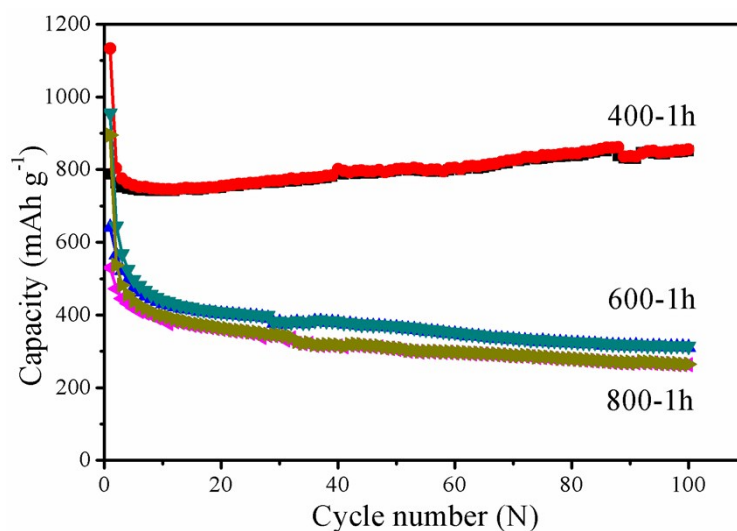

**Fig. S10** Cycling performance at current density of 0.1 A g<sup>-1</sup> for three IS/C samples sintered at 400, 600 and 800 °C for 1 hour, respectively.

As shown in Fig. S10, the calcination temperature was found to be an important factor to obtain high-performance anode materials. It is obvious that the cycling performance of IS/C sample greatly decreased with the increasing temperature from 400 to 600 and 800 °C. This phenomenon might be partly ascribed to the decrease of the carbon content (Fig. S2a). More importantly, the improved bulk crystallinity of In<sub>2</sub>S<sub>3</sub> from 400 to 800 °C shown in Fig. S4 and the distribution of pyrolysis carbon could also bring into the great decrease of cycling performance.
